# Supplementary material for: PEGylated Bilirubin-coated Iron Oxide Nanoparticles as a Biosensor for Magnetic Relaxation Switching-based ROS Detection in Whole Blood
Source: PubMed Central journal article supplement (PMC7019166; doi:10.7150/thno.39662), 2020-01-12
Supplement: thnov10p1997s1.pdf [file thnov10p1997s1.pdf]

## Supplementary Information

### PEGylated Bilirubin-coated Iron Oxide Nanoparticles as a Biosensor for Magnetic Relaxation Switching-based ROS Detection in Whole Blood

Dong Yun Lee,<sup>a,b</sup> Sukmo Kang,<sup>c,d,e</sup> Younghyun Lee,<sup>c,d,e</sup> Jin Yong Kim,<sup>a,d,e</sup> Dohyun Yoo,<sup>c,d,e</sup> Wonsik Jung,<sup>c,d,e</sup> Soyoung Lee,<sup>c,d,e</sup> Yong Yeon Jeong,<sup>f</sup> Kwangyeol Lee,<sup>g</sup> and Sangyong Jon<sup>a,c,d,e,\*</sup>

<sup>a</sup>Graduate School of Medical Science and Engineering, Korea Advanced Institute of Science and Technology (KAIST), 291 Daehak-ro, Daejeon 34141, Republic of Korea

<sup>b</sup>Department of Nuclear Medicine, Asan Medical Center, University of Ulsan College of Medicine, 88, OLYMPIC-RO 43-GIL, Seoul 05505, Republic of Korea

<sup>c</sup>Department of Biological Sciences, KAIST, 291 Daehak-ro, Daejeon 34141, Republic of Korea

<sup>d</sup>KAIST Institute for BioCentury, KAIST, 291 Daehak-ro, Daejeon 34141, Republic of Korea

<sup>e</sup>Center for Precision Bio-Nanomedicine, KAIST, 291 Daehak-ro, Daejeon 34141, Republic of Korea

<sup>f</sup>Department of Radiology, Chonnam National University Hwasun Hospital, 322 Seoyang-ro, Hwasun 58128, Republic of Korea

<sup>g</sup>Department of Chemistry, Korea University, 145 Anam-ro, Seoul 02841, Republic of Korea

**Corresponding Authors:** Sangyong Jon. Phone: +82-10-47210602; Fax: +82-42-3504450; E-mail: syjon@kaist.ac.kr

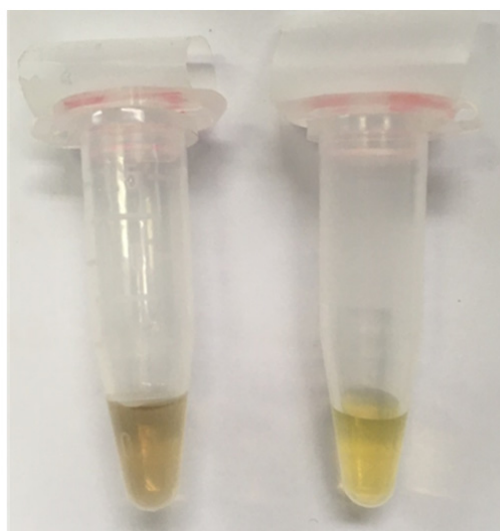

**PEG-DSPE @SPION**    **PEG-BR @SPION**

**Figure S1.** A photograph of as-prepared SPIONs dispersed in phosphate buffered saline (pH 7.4).

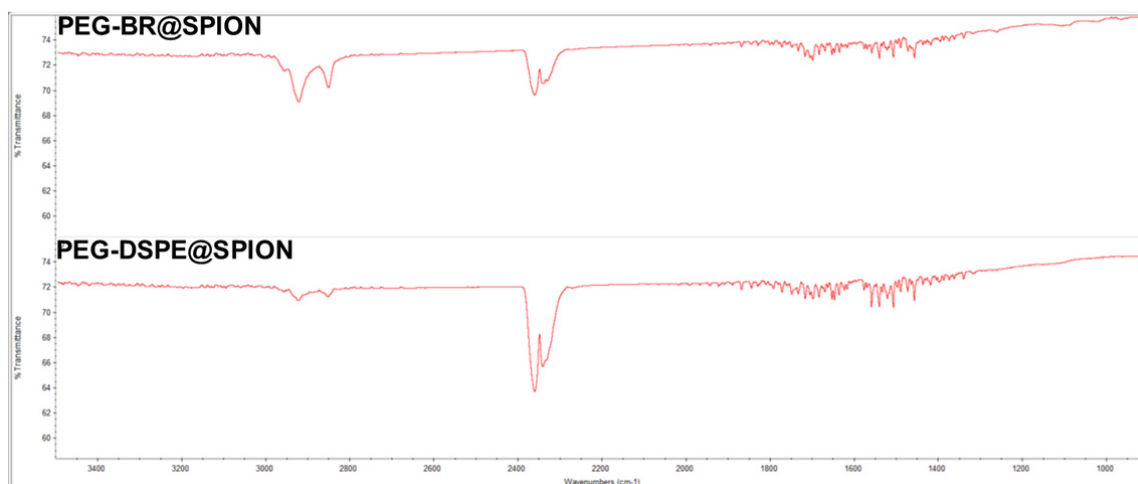

**Figure S2.** FT-IR spectra of as-prepared SPIONs.

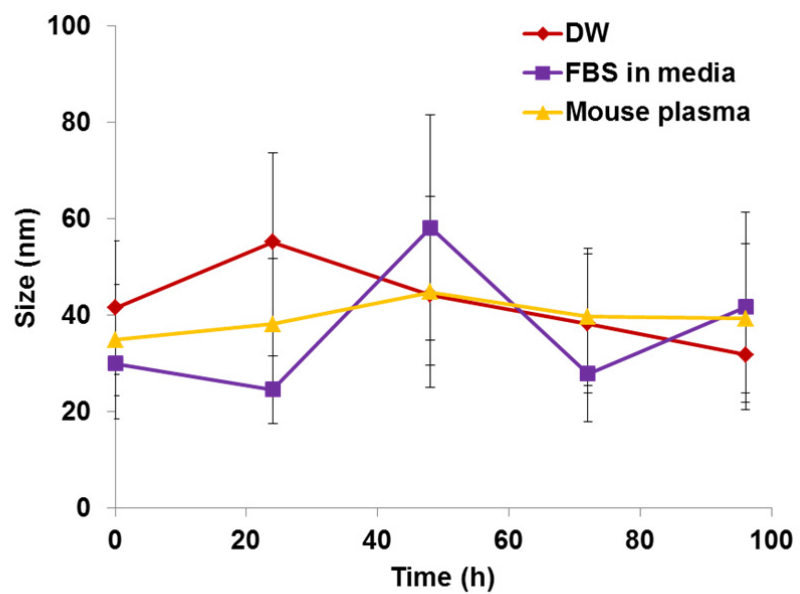

**Figure S3.** Hydrodynamic size measurements of PEG-BR@SPIONs under various conditions as a function of incubation time.

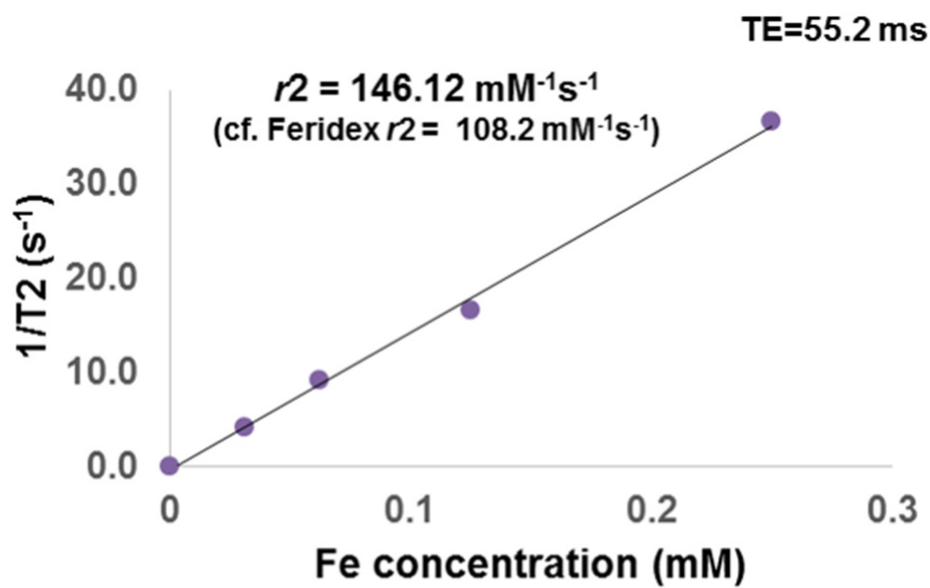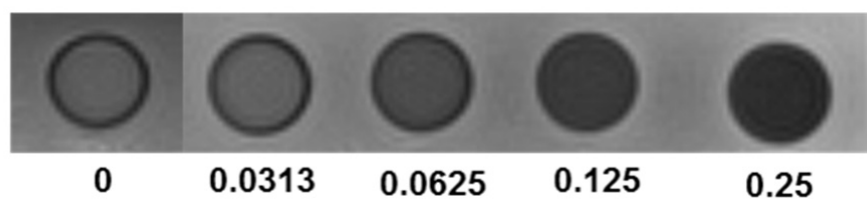

**Figure S4.** Relaxation rates of PEG-BR@SPIONs as a function of Fe concentrations and corresponding  $T_2$  phantom images obtained using 3.0 T MRI.

PEGBR@SPION upon NaOCl, x100, after 1h

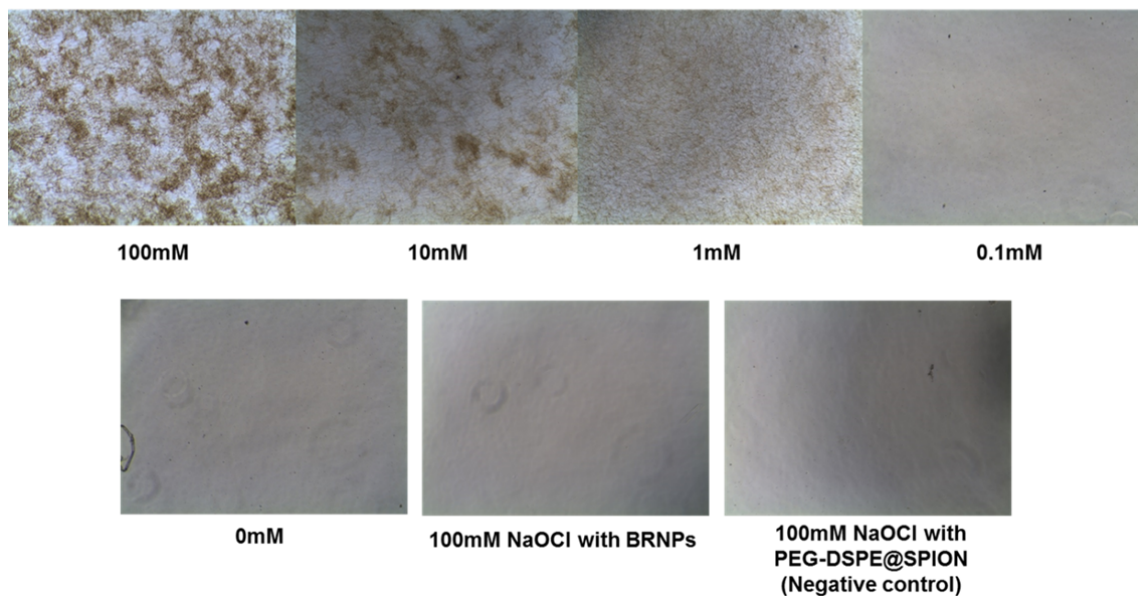

**Figure S5.** Light microscopic images of ROS concentration-dependent aggregation of PEG-BR@SPIONs after reacting with different concentrations of NaOCl. BRNPs denote nanoparticles derived from self-assembly of solely PEG-BR.

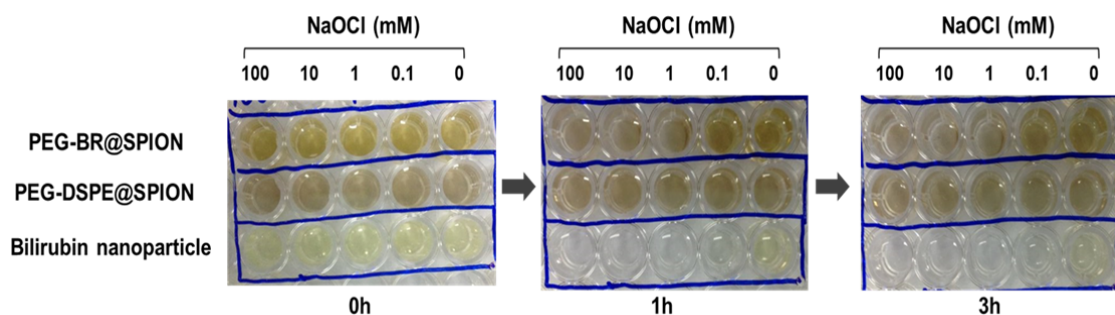

**Figure S6.** Kinetics of color changes of each nanoparticle solution upon incubation with different concentrations of NaOCl-derived ROS.

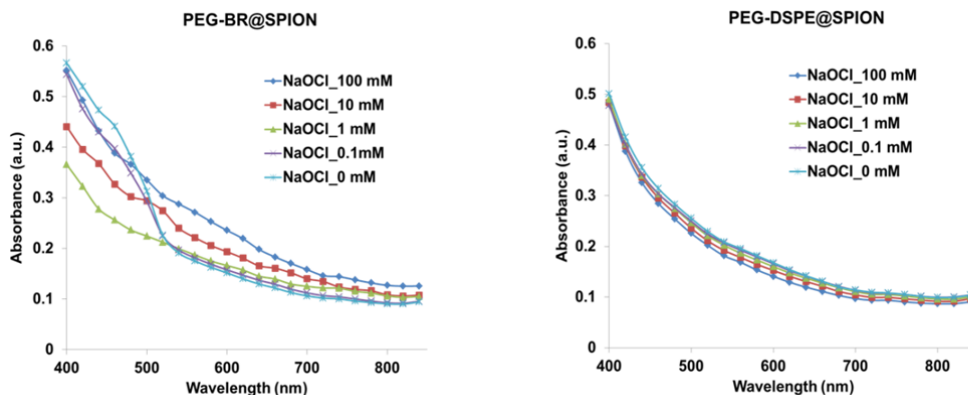

**Figure S7.** Comparison of absorbance changes between PEG-BR@SPIONs and PEG-DSPE@SPIONs after reacting with different concentrations of NaOCl-derived ROS. For PEG-BR@SPIONs, the change in the absorbance at 420 nm indicates that the chemical structure of BR is modified (fragmentized) upon reaction with ROS.

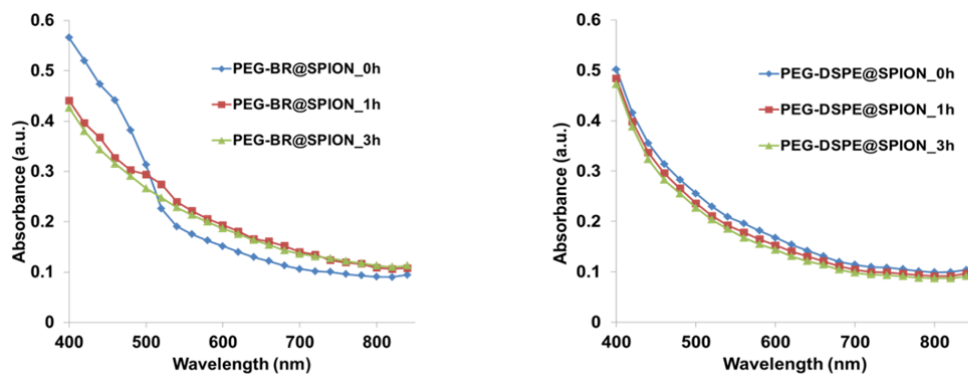

**Figure S8.** Comparison of the kinetics of absorbance changes between PEG-BR@SPIONs and PEG-DSPE@SPIONs after reacting with a fixed concentration of NaOCl-derived ROS (10 mM). For PEG-BR@SPIONs, the change in the absorbance at 420 nm indicates that the chemical structure of BR is modified (fragmentized) upon reaction with ROS.



PEG-BR@SPION upon AAPH, x 400, after 12h

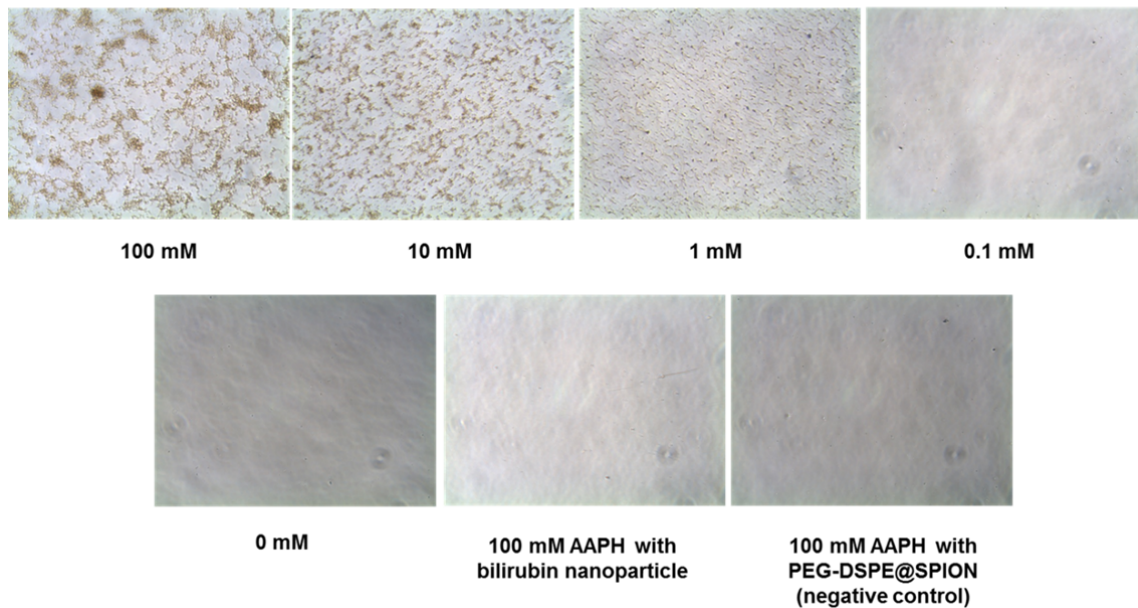

**Figure S9.** Light microscopic images of ROS concentration-dependent aggregation of PEG-BR@SPIONs after reacting with different concentrations of AAPH.

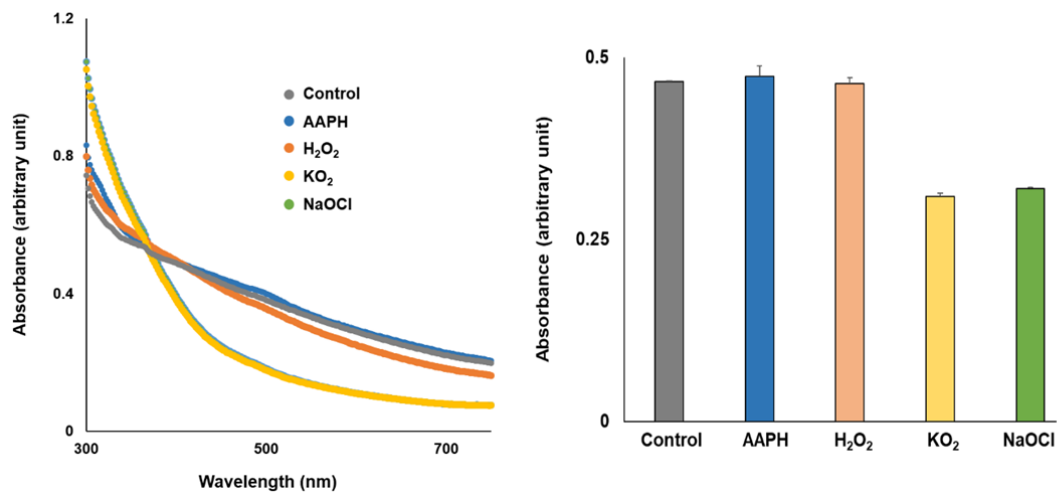

**Figure S10.** Left: UV-Vis Spectra of PEG-BR@SPION (Fe: 50  $\mu\text{M}$ ) taken after treatment with four different ROS (100  $\mu\text{M}$ ) for 12 hours. Right: Comparison of absorbance at 420 nm in the UV-Vis spectra on the left (n = 4).



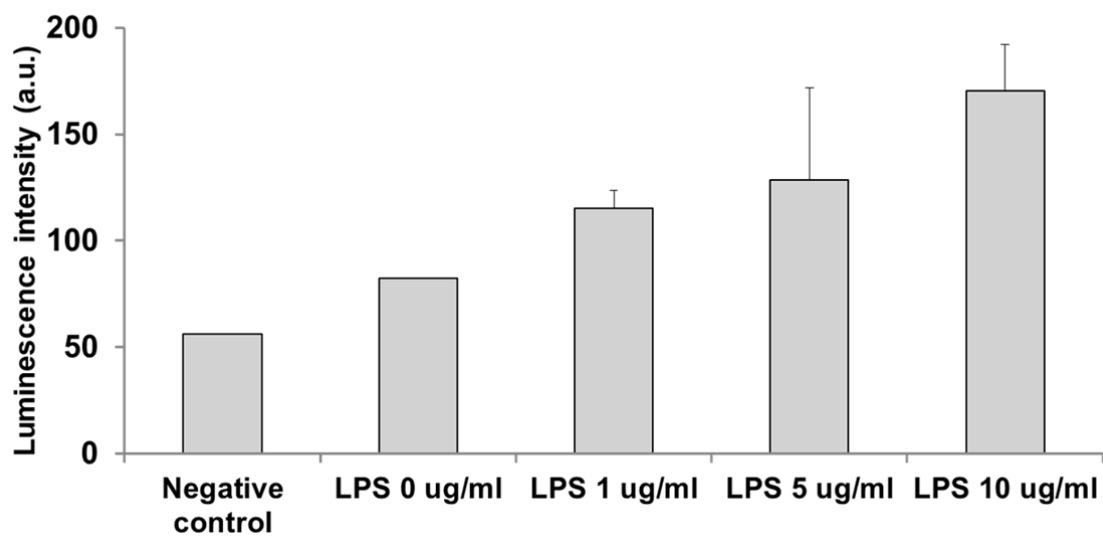

**Figure S11.** Measurements of extracellular ROS production in RAW 264.7 cells after treatments with increasing LPS concentrations.

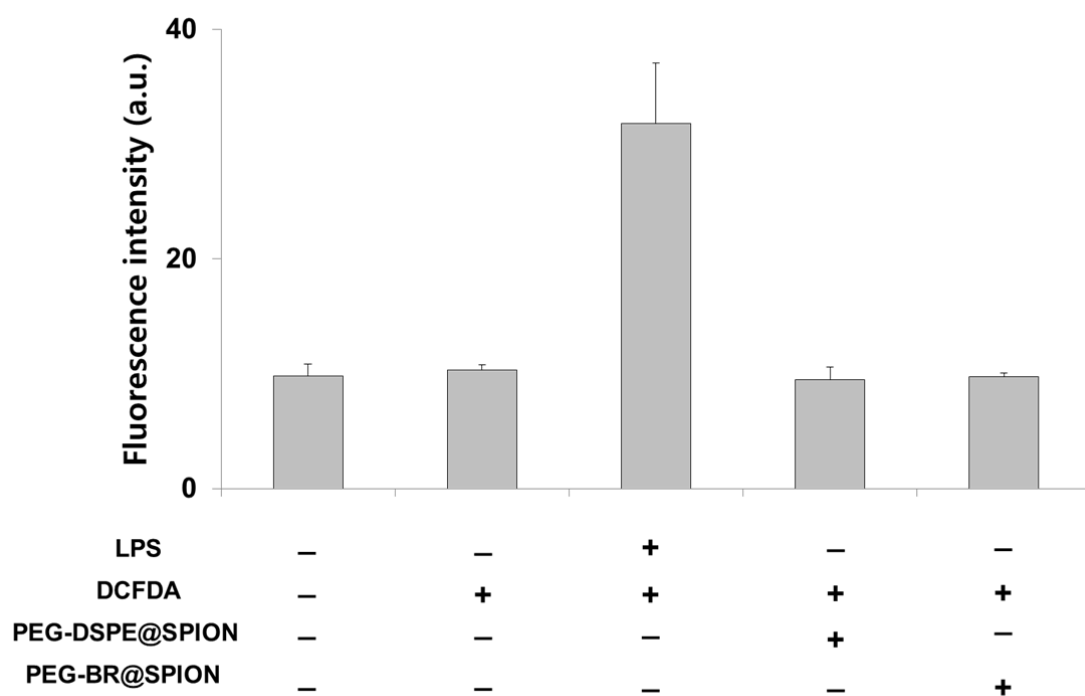

**Figure S12.** Measurements of intracellular ROS production in RAW 264.7 cells following various treatments.

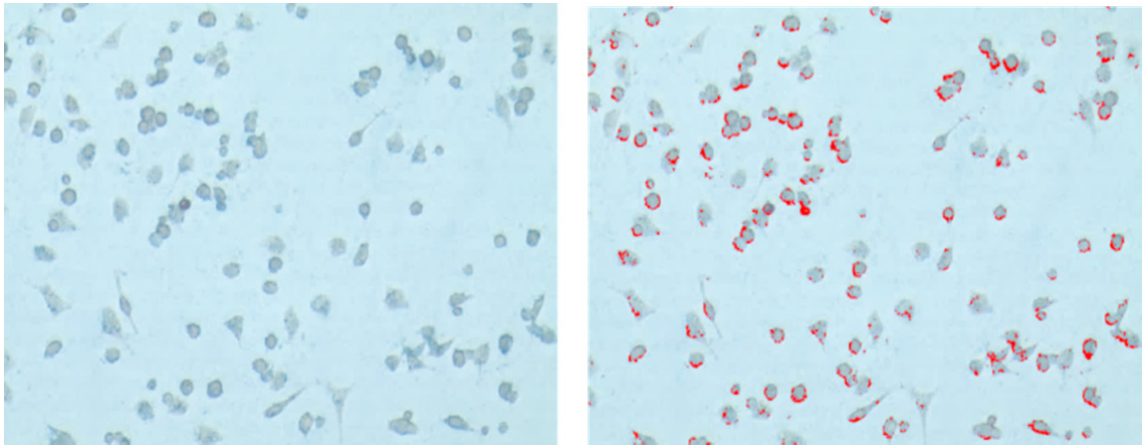

**Figure S13.** Prussian blue-stained (left) and corresponding pseudo-colored image (right) of RAW 264.7 cells after co-treatment with PEG-BR@SPIONs and LPS.

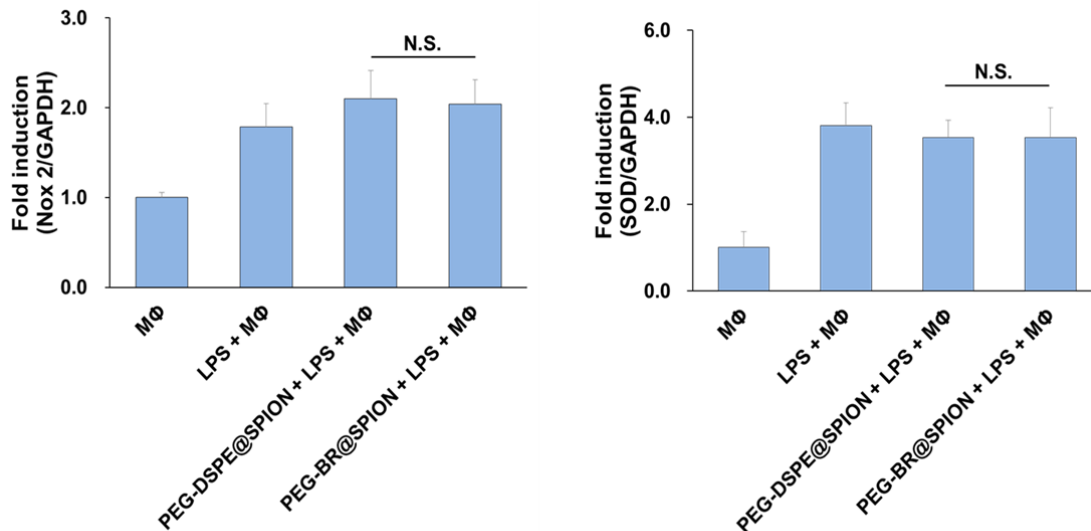

**Figure S14.** Relative mRNA expression levels of ROS-producing enzymes in RAW 264.7 cells in each treated group. Left: NADPH oxidase 2 (Nox2); right: superoxide dismutase (SOD).

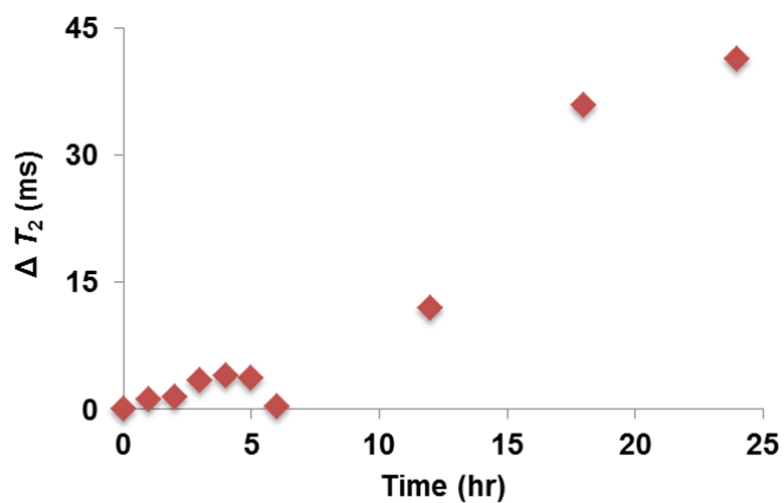

**Figure S15.** Kinetics of the ROS-sensing magnetic relaxation-switching assay of PEG-BR@SPIONs in whole blood after reacting with 300 μM NaOCl.

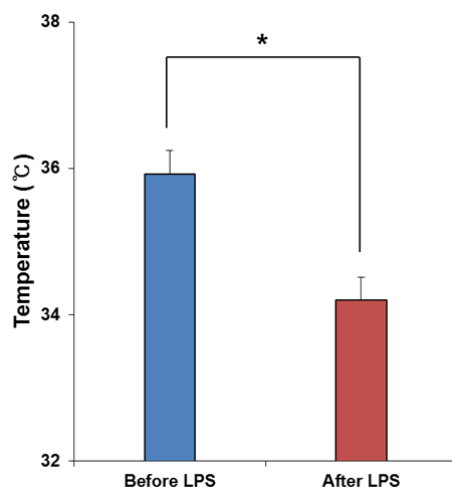

**Figure S16.** Body temperature of C57BL/6 mice measured before and 6 hours after intraperitoneal LPS injection.

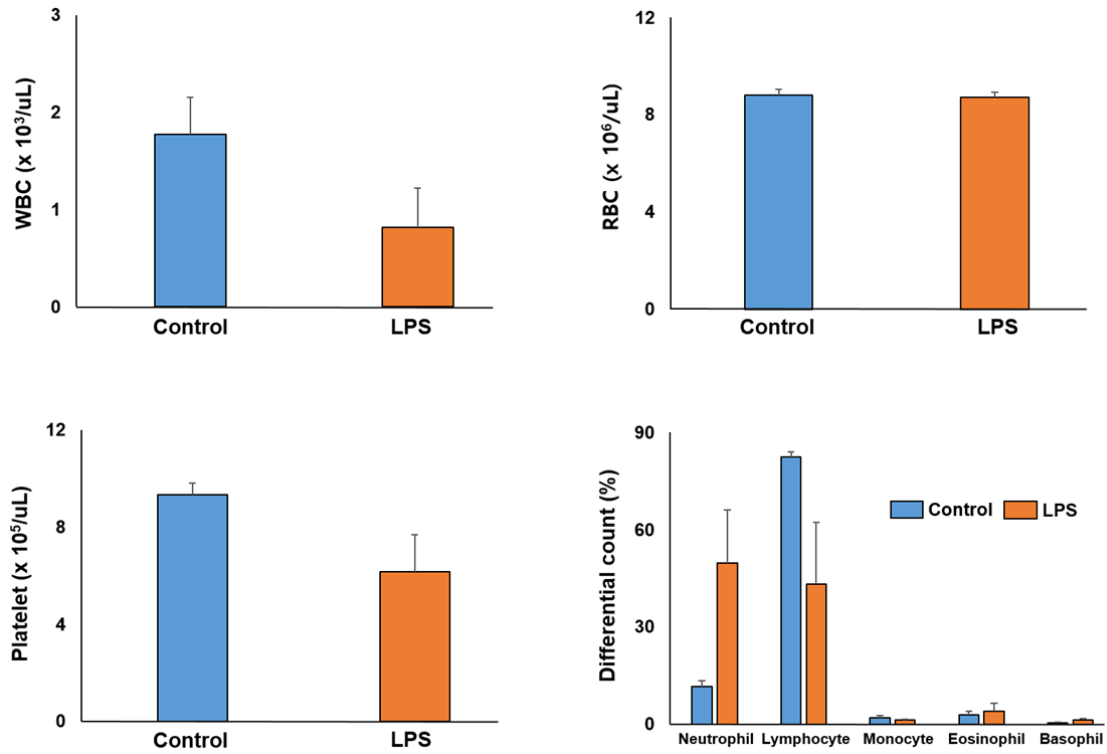

**Figure S17.** Complete blood cell counts and differential white blood cell (WBC) counts in C57BL/6 mice 6 hours after with/without intraperitoneal LPS injection (n = 3).

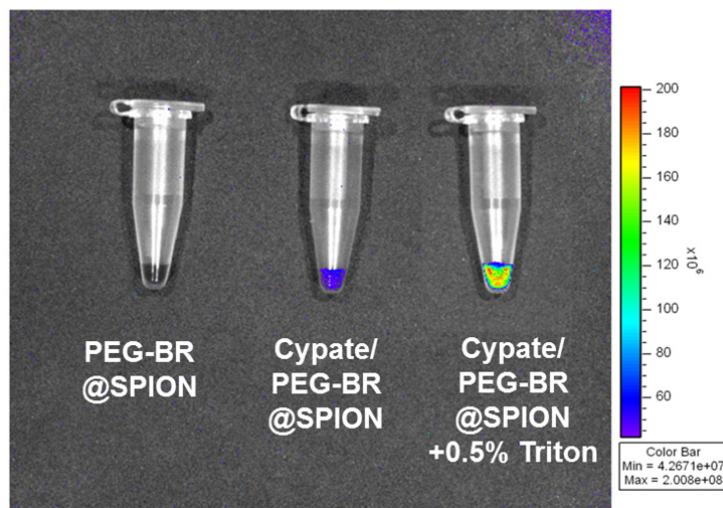

**Figure S18.** *In situ* fluorescence images of Cypate/PEG-BR@SPIONs before and after treatment with Triton X detergent.

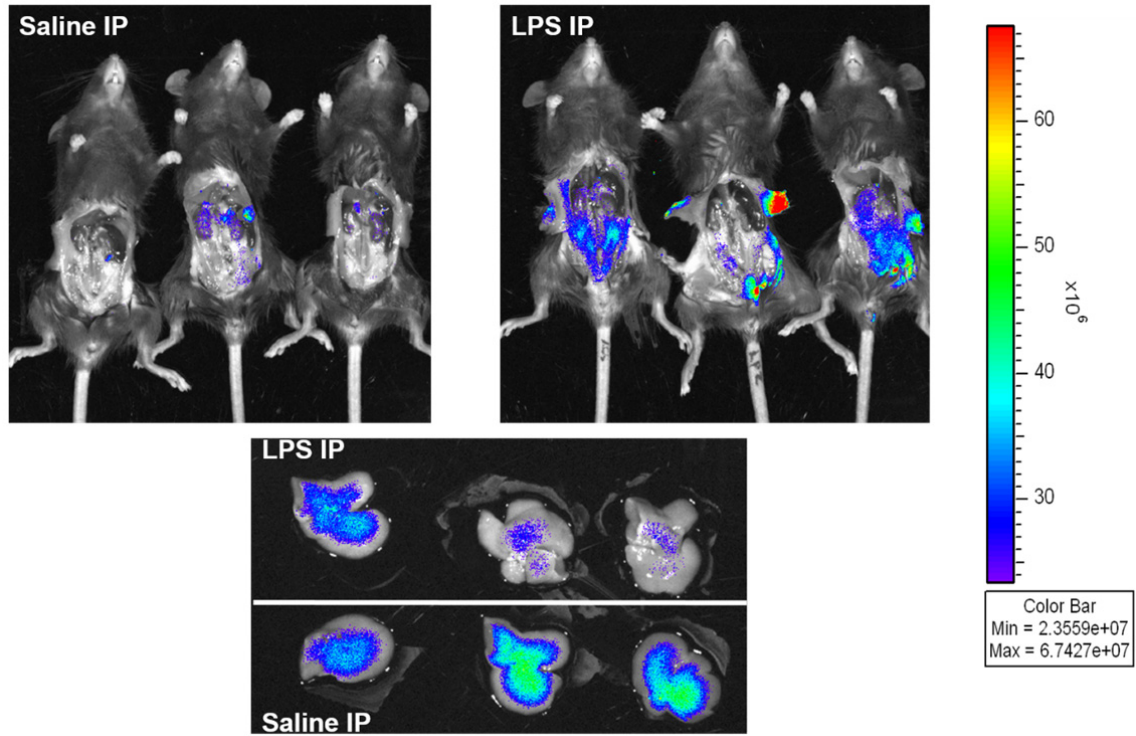

**Figure S19.** *Ex vivo* fluorescence images of Cypate/PEG-BR@SPIONs around the abdominal wall and in the liver after intraperitoneal injection of either saline or LPS (n = 3). The result obtained from the same experiment is shown in Figure 5c.

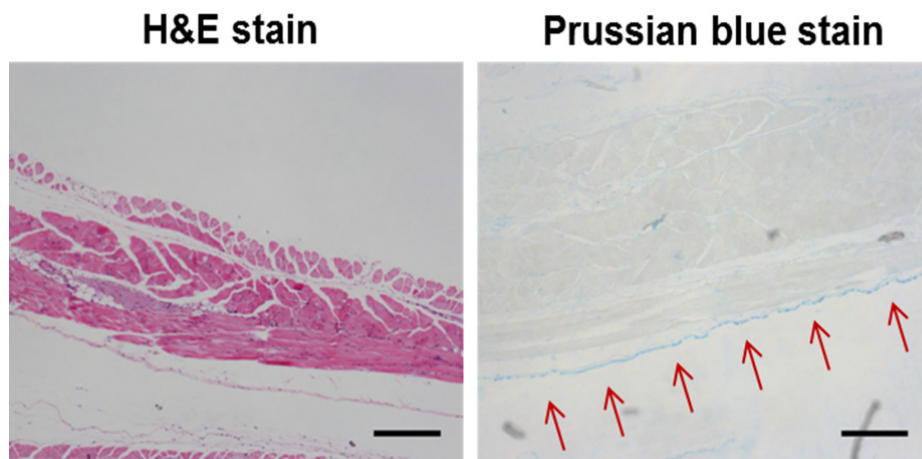

**Figure S20.** H&E-stained and corresponding Prussian blue-stained images of the abdominal wall of mice being treated with Cypate/PEG-BR@SPIONs and LPS presented in Figure 5C. Red arrows indicate the retained iron oxide nanoparticles along the parietal peritoneum. Scale bar, 100  $\mu\text{m}$ .

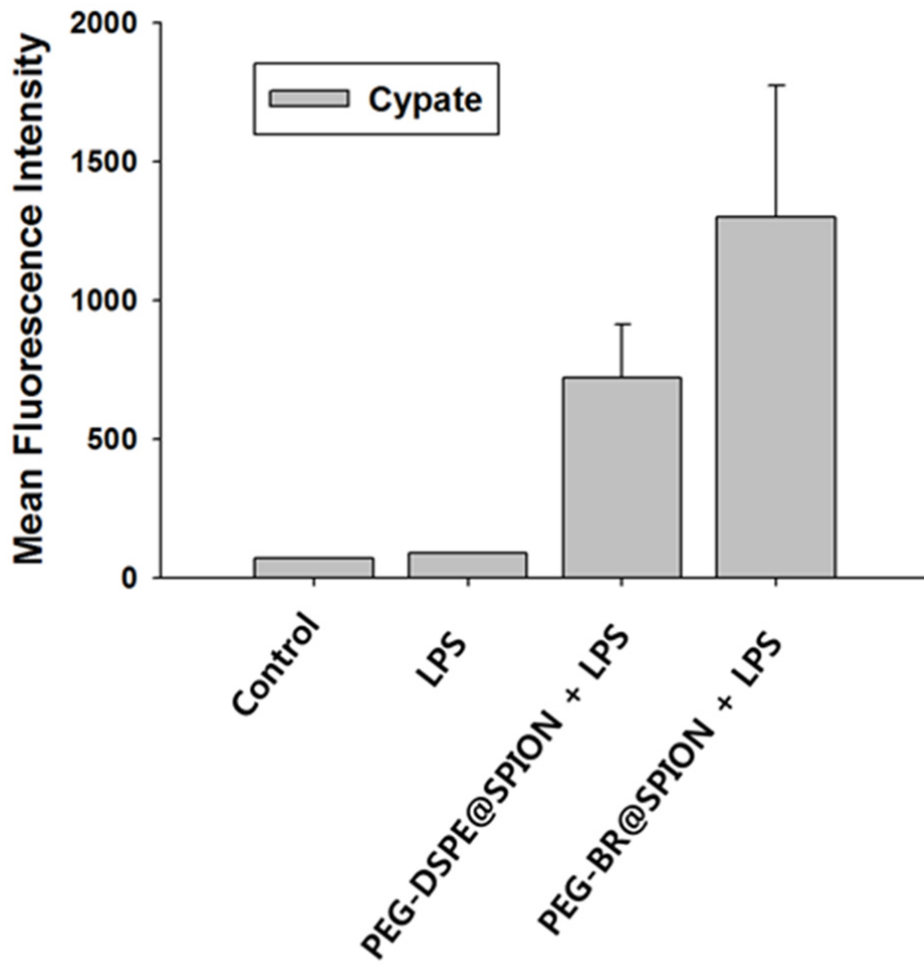

**Figure S21.** Mean fluorescence intensity of cypate uptake in the resident peritoneal cells (n = 3). This result corresponds to Figure 5d.
